# Supplementary material for: In vitro polyploid induction in Allium grayi Regel using colchicine
Source: PeerJ. 2026 Feb 12;14:e20790. doi: 10.7717/peerj.20790 (PMC12906704; doi:10.7717/peerj.20790)
Supplement: Supplemental Information 1 — The effects of all colchicine treatments on the explants, as well as the differences in stomatal characteristics between diploid and tetraploid plants. [file peerj-14-20790-s001.xlsx]

## Sheet: 1
Colchicine (g/L)	Time (hr)	No. shoot	Chimeric	Tetraploid	Variation rate (%)	Induction rate (%)	Survival rate (%)
0	6	10	0	0	-	-	100
		11	0	0
		12	0	0
		10	0	0
	12	9	0	0	-	-	100
		10	0	0
		11	0	0
		12	0	0
	24	12	0	0	-	-	100
		9	0	0
		11	0	0
		8	0	0
	48	8	0	0	-	-	100
		13	0	0
		12	0	0
		7	0	0
1	6	5	0	0	-	-	100
		3	0	0
		2	0	0
		3	0	0
	12	2	0	0	10	-	75
		4	1	0
		4	0	0
		0	0	0
	24	2	0	1	20	20	75
		1	0	0
		2	0	0
		0	0	0
	48	0	0	0	-	-	0
		0	0	0
		0	0	0
		0	0	0
5	6	1	0	0	-	-	50
		0	0	0
		2	0	0
		0	0	0
	12	0	0	0	-	-	0
		0	0	0
		0	0	0
		0	0	0
	24	0	0	0	-	-	0
		0	0	0
		0	0	0
		0	0	0
	48	0	0	0	-	-	0
		0	0	0
		0	0	0
		0	0	0
10	6	0	0	0	-	-	0
		0	0	0
		0	0	0
		0	0	0
	12	0	0	0	-	-	0
		0	0	0
		0	0	0
		0	0	0
	24	0	0	0	-	-	0
		0	0	0
		0	0	0
		0	0	0
	48	0	0	0	-	-	0
		0	0	0
		0	0	0
		0	0	0

## Sheet: 2
Colchicine (g/L)	Resting	No. shoot	Chimeric	Tetraploid	Variation rate (%)	Induction rate (%)	Survival rate (%)
	time (hr)
1	0	2	0	0	-	-	62.5
		3	0	0
		3	0	0
		4	0	0
		2	0	0
		0	0	0
		0	0	0
		0	0	0
	4	2	0	0	7.69	-	75
		1	1	0
		2	0	0
		2	0	0
		1	0	0
		5	0	0
		0	0	0
		0	0	0
	8	2	0	0	-	-	62.5
		1	0	0
		1	0	0
		2	0	0
		1	0	0
		0	0	0
		0	0	0
		0	0	0
	12	1	0	0	-	-	50
		1	0	0
		1	0	0
		1	0	0
		0	0	0
		0	0	0
		0	0	0
		0	0	0
	24	2	0	0	-	-	75
		1	0	0
		3	0	0
		2	0	0
		1	0	0
		2	0	0
		0	0	0
		0	0	0

## Sheet: 3
Colchicine (g/L)	Resting	No. shoot	Chimeric	Tetraploid	Variation rate (%)	Induction rate (%)	Survival rate (%)
	time (Day)
1	0	2	0	1	14.29	7.14	62.5
		3	0	0
		3	0	0
		3	0	0
		3	1	0
		0	0	0
		0	0	0
		0	0	0
	1	2	0	0	9.09	-	62.5
		2	0	0
		2	1	0
		2	0	0
		3	0	0
		0	0	0
		0	0	0
		0	0	0
	3	3	1	0	33.33	-	12.5
		0	0	0
		0	0	0
		0	0	0
		0	0	0
		0	0	0
		0	0	0
		0	0	0
	5	4	2	0	50	-	25
		2	1	0
		0	0	0
		0	0	0
		0	0	0
		0	0	0
		0	0	0
		0	0	0
	7	1	1	0	66.67	-	25
		2	1	0
		0	0	0
		0	0	0
		0	0	0
		0	0	0
		0	0	0
		0	0	0
	10	1	1	0	100	20	37.5
		2	1	1
		2	2	0
		0	0	0
		0	0	0
		0	0	0
		0	0	0
		0	0	0

## Sheet: 4
	Number of stomata (count)	Stomatal density (count/mm2)	Stomatal length (mm)	Stomatal width (mm)
Diploid	67	20.4393	0.023	0.006
	65	19.8292	0.027	0.014
	71	21.6595	0.031	0.01
Tetraploid	40	16.7785	0.043	0.01
	49	14.9481	0.043	0.013
	55	12.2026	0.04	0.012
